# Supplementary material for: An electrochemical cell with Gortex-based electrodes capable of extracting pure hydrogen from highly dilute hydrogen–methane mixtures
Source: Royal Society of Chemistry journal article supplement (doi:10.1039/c7ee02236k), 2017-12-07
Supplement: c7ee02236k1.pdf [file c7ee02236k1.pdf]

- SUPPLEMENTARY MATERIAL -

# An Electrochemical Cell with Gortex-based Electrodes Capable of Extracting Pure Hydrogen from Highly Dilute Hydrogen-Methane Mixtures

Klaudia Wagner,\* Prerna Tiwari, Gerhard F. Swiegers,\* Gordon G. Wallace

*Intelligent Polymer Research Institute and ARC Centre of Excellence for Electromaterial Science,  
University of Wollongong, Wollongong, NSW 2522, Australia*

*Email: kwagner@uow.edu.au; swiegers@uow.edu.au*

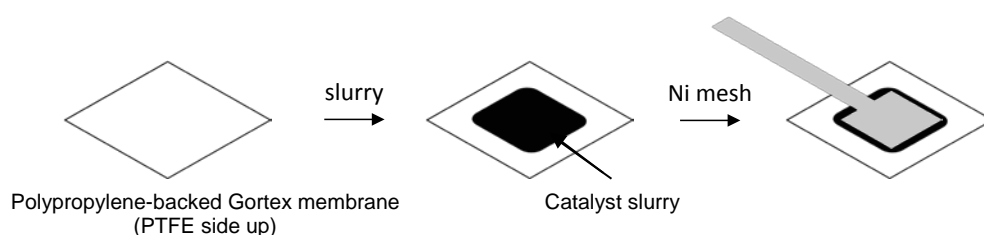

**Figure S1.** Preparation of slurry/mesh/Gortex membrane assemblies.

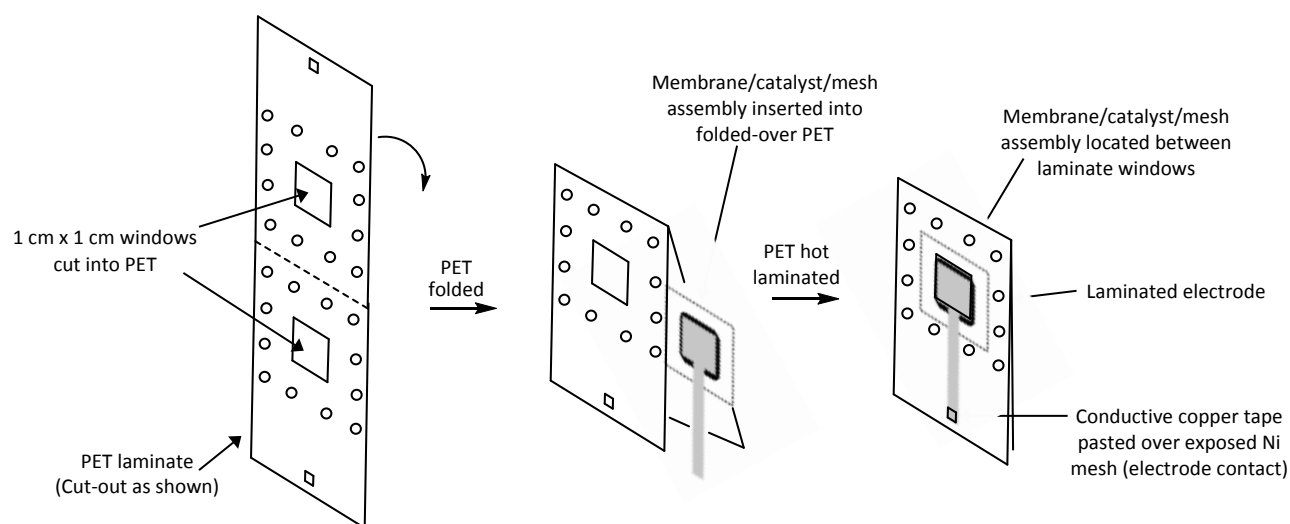

**Figure S2.** Preparation of laminate-mounted electrodes.

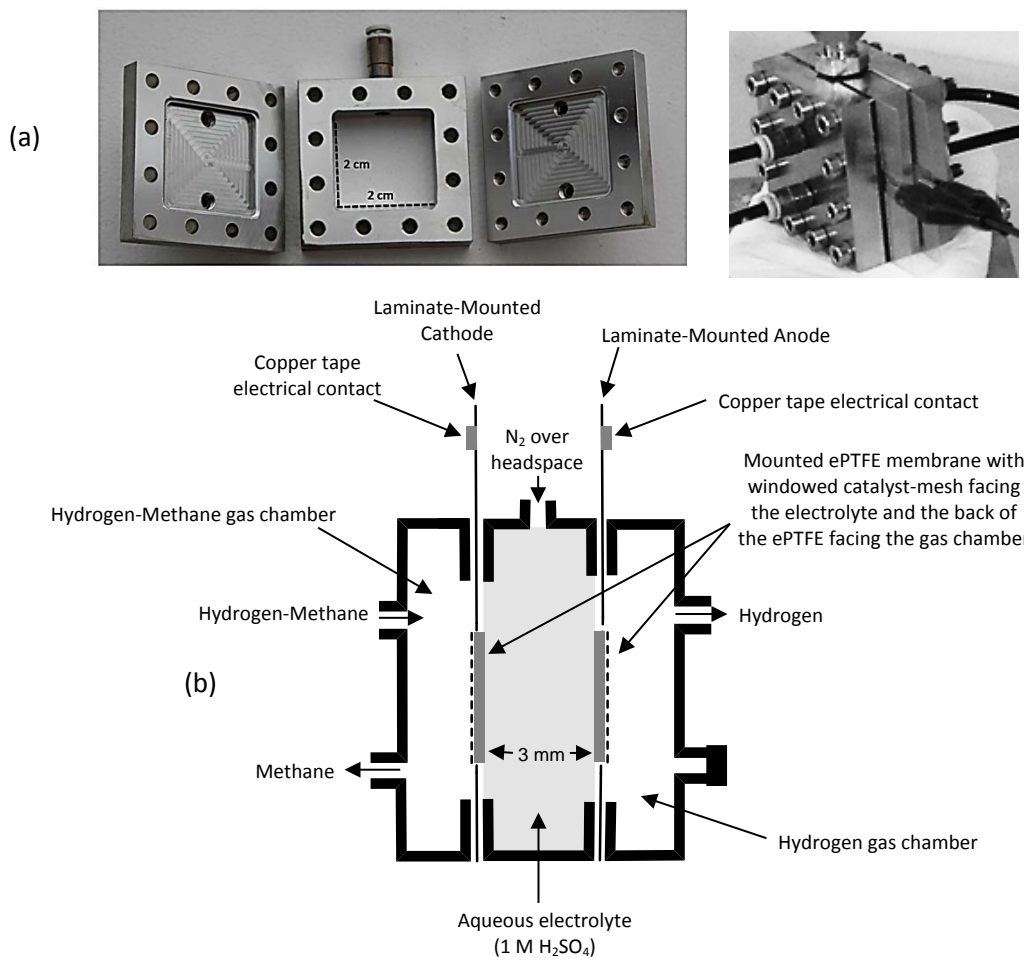

**Figure S3.** Photographs (a) and cross-sectional schematic (b) of the test cell, showing the electrical and gas connections.

| Experiment number | Flow conditions at anode                                                                                                                                                                                                                     | Potential applied                          | Observation                                                                                                                                                                       |
|-------------------|----------------------------------------------------------------------------------------------------------------------------------------------------------------------------------------------------------------------------------------------|--------------------------------------------|-----------------------------------------------------------------------------------------------------------------------------------------------------------------------------------|
| 1                 | 10 mL/min, pure (100%) CH <sub>4</sub>                                                                                                                                                                                                       | None (3-electrode; vs Ag/AgCl)             | No bubbles due to CH <sub>4</sub> crossover observed at cathode when monitored for 20 min                                                                                         |
| 2                 | 50 mL/min, pure (100%) CH <sub>4</sub>                                                                                                                                                                                                       | None (3-electrode; vs Ag/AgCl)             | No bubbles due to CH <sub>4</sub> crossover observed at cathode when monitored for 20 min                                                                                         |
| 3                 | 10 mL/min, pure (100%) CH <sub>4</sub>                                                                                                                                                                                                       | -0.2 to +0.4 V (3-electrode; vs Ag/AgCl)   | No current observed and no bubbles observed at cathode                                                                                                                            |
| 4                 | 50 mL/min, pure (100%) CH <sub>4</sub>                                                                                                                                                                                                       | -0.2 to +0.4 V (3-electrode; vs Ag/AgCl)   | No current observed and no bubbles observed at cathode                                                                                                                            |
| 5                 | During potential sweep: 10 ml/min CH <sub>4</sub> + 10 ml/min H <sub>2</sub> (i.e. 50% H <sub>2</sub> & 50% CH <sub>4</sub> ).<br><br>After potential sweep (at +0.4 V): H <sub>2</sub> flow turned off (i.e. becomes 100% CH <sub>4</sub> ) | -0.2 V to +0.4 V (3-electrode; vs Ag/AgCl) | Increasing currents observed with increasing potential. At +0.4V vs Ag/AgCl, when H <sub>2</sub> flow was stopped, the current fell to zero (with CH <sub>4</sub> flow still on). |
| 6                 | During potential sweep: 10 ml/min CH <sub>4</sub> + 10 ml/min H <sub>2</sub> (i.e. 50% H <sub>2</sub> & 50% CH <sub>4</sub> ).<br><br>After potential sweep (at +0.7 V): H <sub>2</sub> flow turned off (i.e. becomes 100% CH <sub>4</sub> ) | -0.2 V to +0.7 V (2-electrode)             | Increasing currents observed with increasing potential. At +0.7 V, when H <sub>2</sub> flow is stopped, current falls to zero. (Graph shown below)                                |

**Table S1.** Experiments to assess methane reactivity at the anode and methane crossover to the cathode during cell operation.

Graphical data from experiment 6 above:

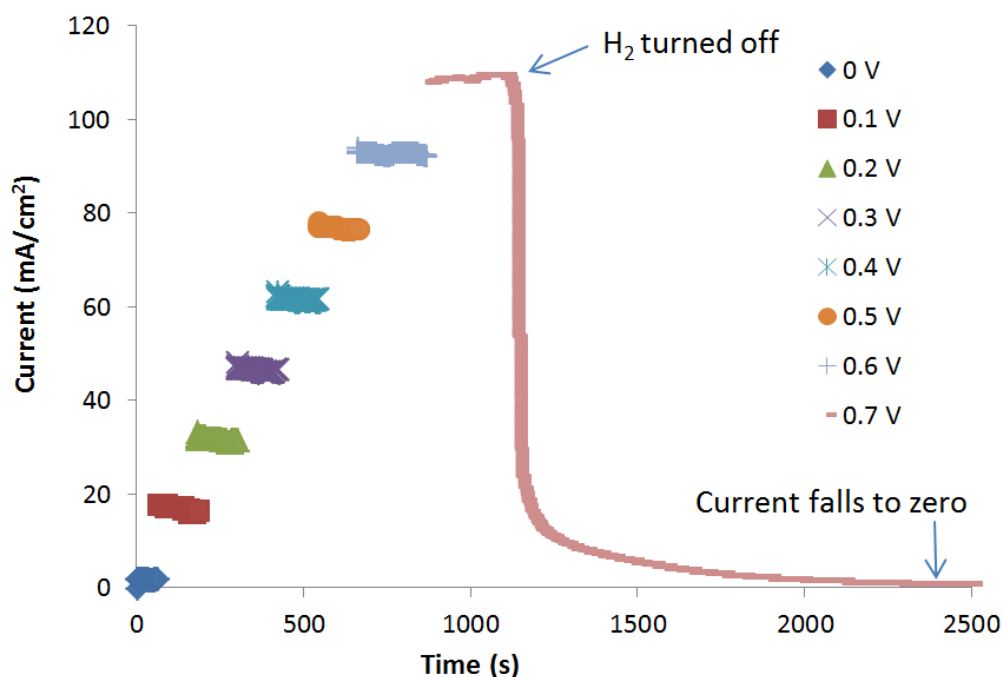

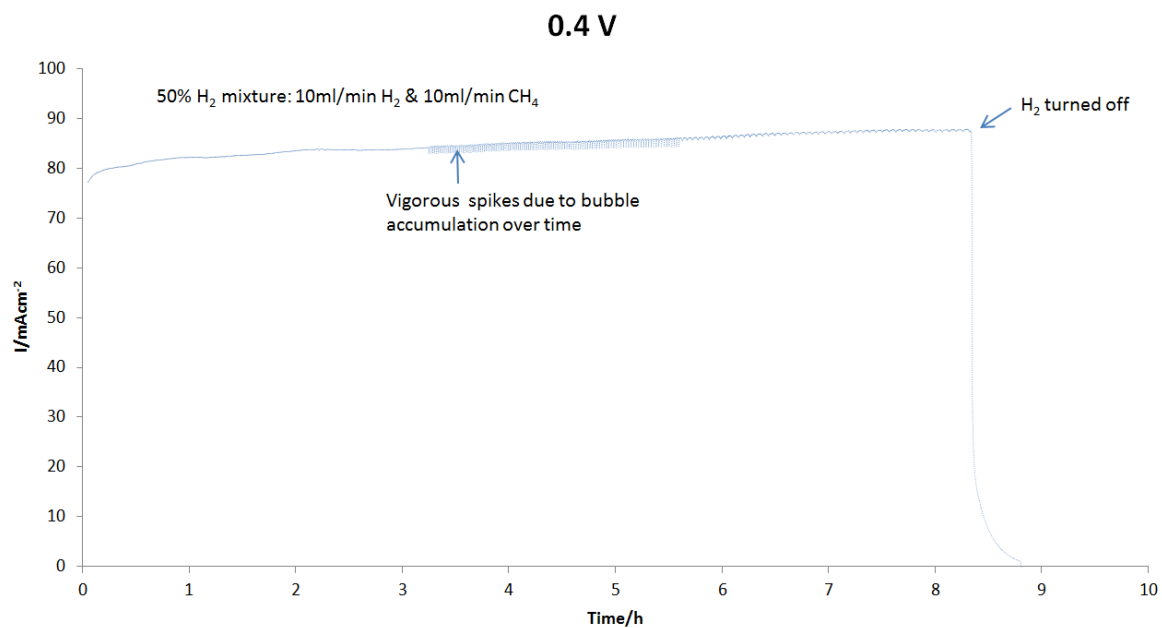

**Figure S4.** Long-term performance of the cell at 0.4 V (vs. Ag/AgCl) with a mixture of 10 mL/min hydrogen and 10 mL/min methane flowing through the anode.
